# Supplementary material for: Degradable and salt-responsive random copolymers
Source: Royal Society of Chemistry journal article supplement (doi:10.1039/c2py20626a), 2012-09-13
Supplement: c2py20626a.pdf [file c2py20626a.pdf]

# Degradable and Salt-Responsive Random Copolymers

Kejian Yao<sup>†</sup>, Chuanbing Tang<sup>\*†</sup>

<sup>†</sup> Department of Chemistry and Biochemistry, University of South Carolina,  
631 Sumter Street, Columbia, South Carolina 29208, USA.

Jun Zhang<sup>‡</sup>, Clay Bunyard<sup>‡</sup>

<sup>‡</sup> Department of Material Science, Corporate Research & Engineering,  
Kimberly-Clark Corporation, 2100 Winchester Road, Neenah, WI 54956, USA.

## Supplementary Information

Thermal properties of cationic copolymers PCL-*co*-P(CL-*g*-QA) were characterized by Differential scanning calorimetry (DSC) and Thermogravimetric analysis (TGA). TGA was operated on a SDT Q600 TGA system (TA instruments), ramping from 25 °C to 1000 °C at a rate of 20 °C/min, and maintaining for 5 min at 1000 °C. DSC experiment was conducted on a DSC Q200 instrument (TA instruments). The samples were heated from –80 °C to 200 °C at a rate of 10 °C/min, maintained for 2 min at 200 °C and then cooled to –80 °C at a rate of 10 °C/min. The data were collected at the second scan.

As shown in Figure S1, the cationic copolymer has a  $T_g$  at around –60 °C. Also the copolymer has melting temperatures ( $T_m$ ) at between ~40 °C and ~50 °C as well as a crystallization temperature  $T_c$  at ~20 °C due to the crystallinity of PCL. As shown in Figure S2, the copolymer showed a typical two-stage weight loss behavior.

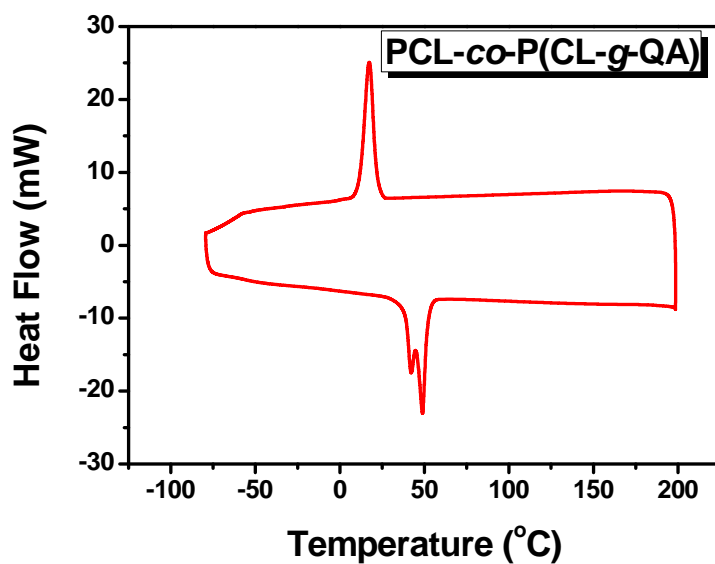

**Figure S1.** DSC curve of degradable cationic copolymer PCL-co-P(CL-g-QA) (Table 1 Entry 3 )

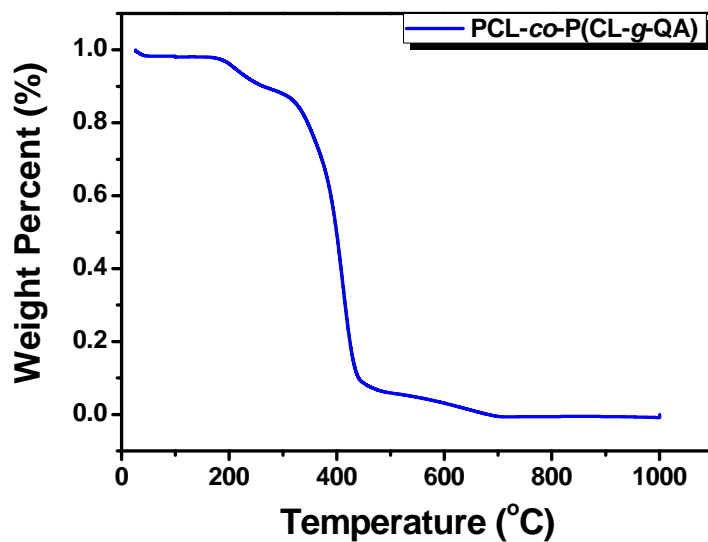

**Figure S2.** TGA curve of degradable cationic copolymer PCL-co-P(CL-g-QA) (Table 1 Entry 3)
